# Supplementary material for: Adsorption behavior of a computer-aid designed magnetic molecularly imprinted polymer via response surface methodology
Source: Royal Society of Chemistry journal article supplement (doi:10.1039/c5ra10367c), 2015-01-01
Supplement: c5ra10367c1.pdf [file c5ra10367c1.pdf]

## Electronic Supplementary Information

### Adsorption behavior of computer-aid designed magnetic molecularly imprinted polymer via response surface methodology

Kai Zhang<sup>a</sup>, Wenyue Zou<sup>a</sup>, Hongyan Zhao<sup>ab</sup>, Pierre Dramou<sup>a</sup>, Chuong Pham-Huy<sup>c</sup>, Jia He<sup>a</sup>, Hua He<sup>ad\*</sup>

<sup>a</sup>*Department of Analytical Chemistry, School of Sciences, China Pharmaceutical University, Nanjing 210009, Jiangsu, China.*

<sup>b</sup>*Department of Hygienic Analysis and Detection, School of Public Health, Nanjing Medical University, Nanjing, Jiangsu 211166, China.*

<sup>c</sup>*Faculty of Pharmacy, University of Paris V, Paris, 75006 France*

<sup>d</sup>*Key Laboratory of Drug Quality Control and Pharmacovigilance, Ministry of Education, China Pharmaceutical University, Nanjing 210009, China*

*\*Corresponding author. Tel.: +86 025 83271505; fax: +86 025 83271505*

*E-mail address: jcb315@163.com; dochehua@163.com (H. HE)*

**S1** Minimized energies of template and functional monomers

| Structures | E(kcal mol <sup>-1</sup> ) |
|------------|----------------------------|
| AML        | -7.79                      |
| MAA        | -14.91                     |
| AA         | -29.20                     |
| MAM        | -29.84                     |
| AM         | -32.76                     |
| 2-VP       | -2.10                      |
| 4-VP       | -2.63                      |

**S2** Docking energies of AML with 6 functional monomers in different ratio

| Ratio of AML to<br>functional monomer | Docking energy (kcal mol <sup>-1</sup> ) |       |       |       |       |       |
|---------------------------------------|------------------------------------------|-------|-------|-------|-------|-------|
|                                       | MAA                                      | AA    | MAM   | AM    | 2-VP  | 4-VP  |
| 1:1                                   | 17.59                                    | 12.29 | 2.49  | 7.79  | 1.44  | 2.54  |
| 1:2                                   | 15.51                                    | 16.51 | 7.44  | 11.71 | 16.25 | 7.22  |
| 1:3                                   | 16.84                                    | 6.37  | 18.36 | 14.65 | 2.03  | 10.83 |
| 1:4                                   | 24.95                                    | 2.81  | 15.86 | 18.97 | 15.60 | 14.58 |
| 1:5                                   | 6.08                                     | 3.15  | 10.33 | 16.37 | 5.14  | 15.03 |
| 1:6                                   | 9.86                                     | 15.18 | 18.78 | 11.00 | 11.47 | 12.48 |

**S3** Combinations of experimental conditions according to Box-Behnken Design

| No. | Amount of material (mg) | Concentration of solution ( $\mu\text{g mL}^{-1}$ ) | Temperature (K) |
|-----|-------------------------|-----------------------------------------------------|-----------------|
| 1   | 5                       | 25                                                  | 310.5           |
| 2   | 5                       | 50                                                  | 298             |
| 3   | 5                       | 50                                                  | 323             |
| 4   | 5                       | 75                                                  | 310.5           |
| 5   | 10                      | 25                                                  | 298             |
| 6   | 10                      | 25                                                  | 323             |
| 7   | 10                      | 50                                                  | 310.5           |
| 8   | 10                      | 50                                                  | 310.5           |
| 9   | 10                      | 50                                                  | 310.5           |
| 10  | 10                      | 50                                                  | 310.5           |
| 11  | 10                      | 50                                                  | 310.5           |
| 12  | 10                      | 75                                                  | 298             |
| 13  | 10                      | 75                                                  | 323             |
| 14  | 15                      | 25                                                  | 310.5           |
| 15  | 15                      | 50                                                  | 298             |
| 16  | 15                      | 50                                                  | 323             |
| 17  | 15                      | 75                                                  | 310.5           |

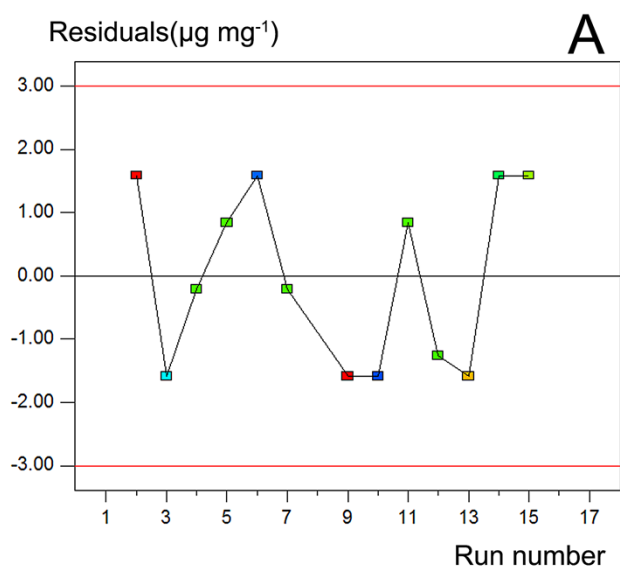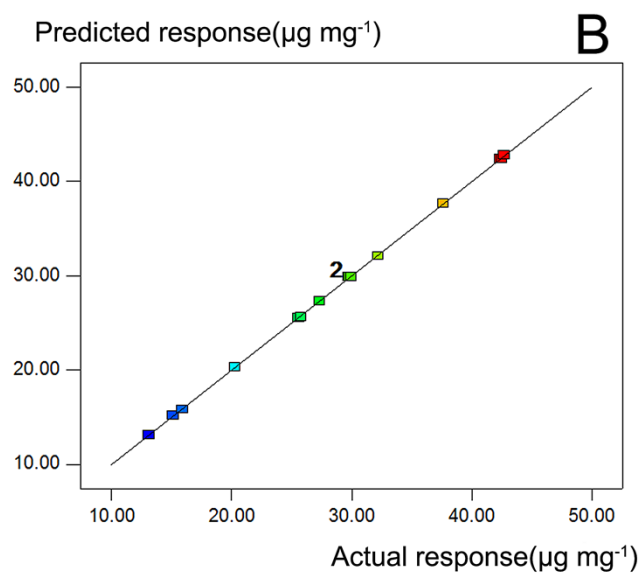

**S4** (A) Residuals of 17 combinations; (B) comparison of actual and predicted responses
